# Supplementary material
Source: Springer Nature journal article supplement (https://www.springermedizin.de/resource/supplementary/13019_2013_1427_MOESM5_ESM.pdf/9640642)
Supplement: MOESM5 [file 9640642]

| Model  | Study name  | Statistics for each study |             |             |         |         | Odds ratio and 95% CI |      |      |      |      |      |       |
|--------|-------------|---------------------------|-------------|-------------|---------|---------|-----------------------|------|------|------|------|------|-------|
|        |             | Odds ratio                | Lower limit | Upper limit | Z-Value | p-Value | 0.10                  | 0.20 | 0.50 | 1.00 | 2.00 | 5.00 | 10.00 |
|        | Yixianhua   | 0.384                     | 0.275       | 0.536       | -5.611  | 0.000   |                       |      |      |      |      |      |       |
|        | noguchi     | 1.003                     | 0.584       | 1.724       | 0.012   | 0.990   |                       |      |      |      |      |      |       |
|        | angioi      | 1.204                     | 0.688       | 2.106       | 0.651   | 0.515   |                       |      |      |      |      |      |       |
|        | chenshaolia | 0.312                     | 0.110       | 0.883       | -2.195  | 0.028   |                       |      |      |      |      |      |       |
|        | hoye        | 0.409                     | 0.308       | 0.544       | -6.140  | 0.000   |                       |      |      |      |      |      |       |
|        | drozd       | 0.837                     | 0.537       | 1.307       | -0.781  | 0.435   |                       |      |      |      |      |      |       |
|        | valenti     | 0.954                     | 0.590       | 1.543       | -0.193  | 0.847   |                       |      |      |      |      |      |       |
|        | olivari     | 0.412                     | 0.224       | 0.756       | -2.860  | 0.004   |                       |      |      |      |      |      |       |
|        | Finci       | 0.709                     | 0.398       | 1.262       | -1.170  | 0.242   |                       |      |      |      |      |      |       |
|        | labriolle   | 6.362                     | 1.453       | 27.867      | 2.455   | 0.014   |                       |      |      |      |      |      |       |
|        | Liubinwei   | 0.533                     | 0.079       | 3.588       | -0.646  | 0.518   |                       |      |      |      |      |      |       |
| Fixed  |             | 0.585                     | 0.504       | 0.680       | -7.008  | 0.000   |                       |      |      |      |      |      |       |
| Random |             | 0.689                     | 0.488       | 0.971       | -2.125  | 0.034   |                       |      |      |      |      |      |       |
